# Supplementary material for: Foliar Application of Silicon in Vitis vinifera: Targeted Metabolomics Analysis as a Tool to Investigate the Chemical Variations in Berries of Four Grapevine Cultivars
Source: MDPI journal article supplement (doi:10.3390/plants11212998), 2022-11-07
Supplement: s1 [file s1]

# Foliar Application of Silicon in *Vitis vinifera*: Targeted Metabolomics Analysis as a Tool to Investigate the Chemical Variations in Berries of Four Grapevine Cultivars

Stefania Sut <sup>1,\*</sup>, Mario Malagoli <sup>2</sup> and Stefano Dall'Acqua <sup>1</sup>

<sup>1</sup> Department of Pharmaceutical and Pharmacological Sciences, University of Padova, Via Marzolo 5, 35121 Padova, Italy

<sup>2</sup> Department of Agronomy, Animals, Food, Natural Resources and Environment, University of Padova, Viale dell'Università 16, 35020 Padova, Italy

\* Correspondence: stefania.sut@unipd.it

Table S1. Carbon (C), Nitrogen (N) and Sulfur (S) content in berries. T- berries exposed to 501-treatment; C- control berries. Data are in % of dry weight. \*p<0.05 treated versus control

|            | %C         |            | %N        |           | %S        |           |
|------------|------------|------------|-----------|-----------|-----------|-----------|
|            | T          | C          | T         | C         | T         | C         |
| Teroldego  | 51.05±0.32 | 51.57±0.56 | 0.53±0.40 | 0.51±0.12 | 0.36±0.13 | 0.23±0.06 |
| Oseletta   | 52.8±0.27  | 51.95±0.97 | 0.53±0.06 | 0.50±0.18 | 0.19±0.07 | 0.23±0.11 |
| Garganega  | 51.23±0.73 | 51.75±0.43 | 0.37±0.18 | 0.50±0.16 | 0.28±0.12 | 0.29±0.08 |
| Chardonnay | 52.40±0.61 | 52.27±0.66 | 0.54±0.22 | 0.43±0.10 | 0.31±0.18 | 0.28±0.09 |

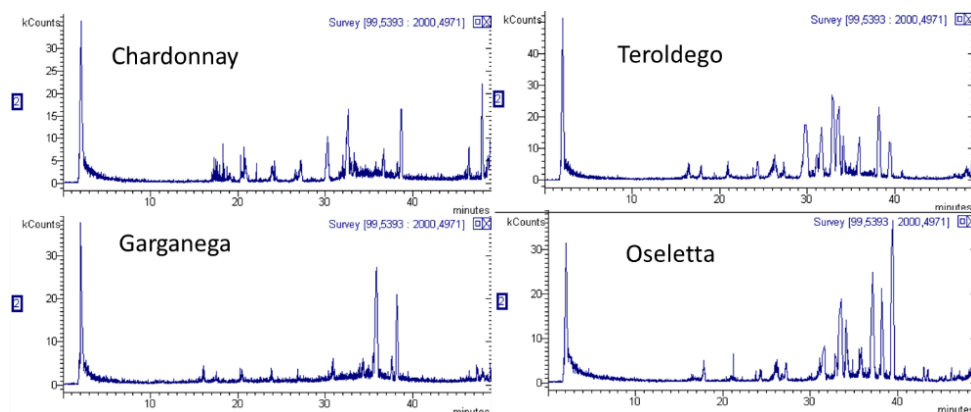

Figure S1. Exemplative LC-MS chromatograms TIC (total ion Current) of the metabolites of the berries in the four grape cultivars.

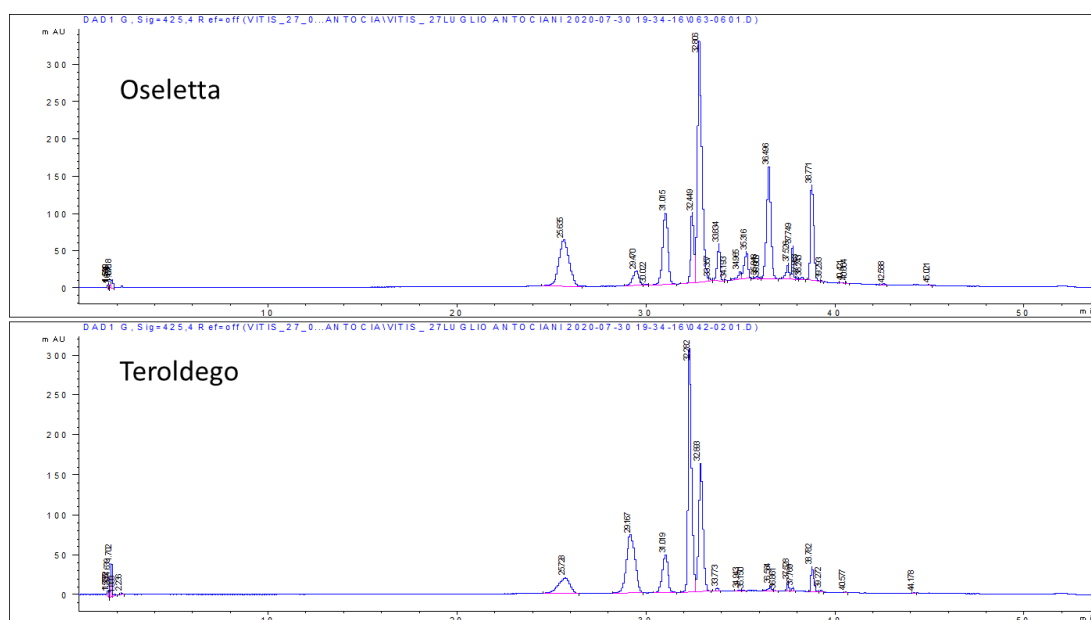

Figure S2. Exemplative enlarged chromatogram at 540nm obtained by LC-DAD of the anthocyanins in the berries of Oseletta (above) and Teroldego (below). Peaks were identified on the base of  $m/z$  value and fragmentation pathways.

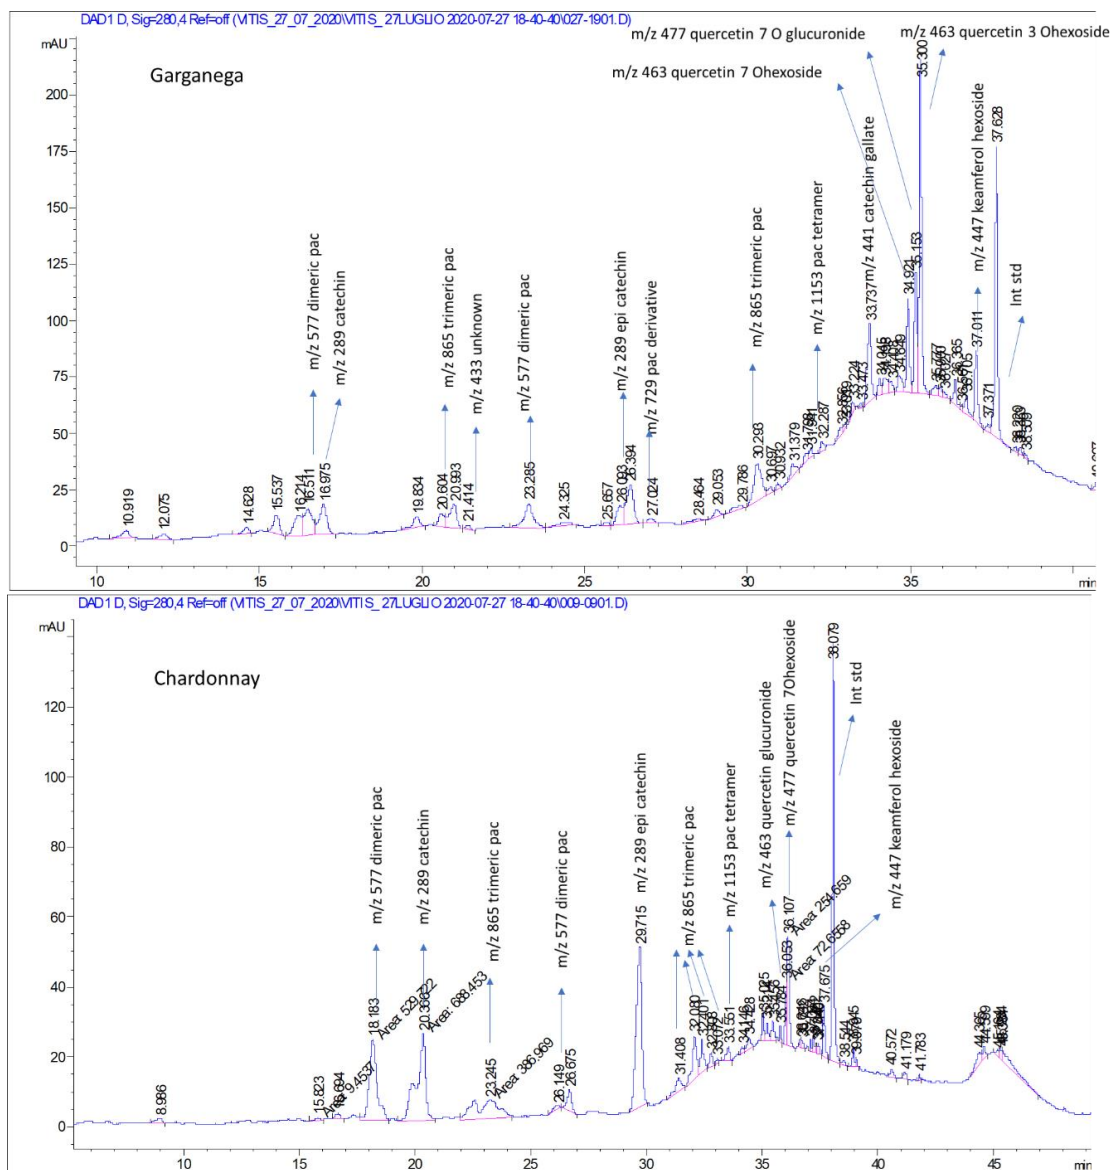

Figure S3. Exemplative chromatogram at 280 nm of Garganega (above) and Chardonnay (below) berries. Peaks were identified on the base of m/z value and fragmentation pathways.

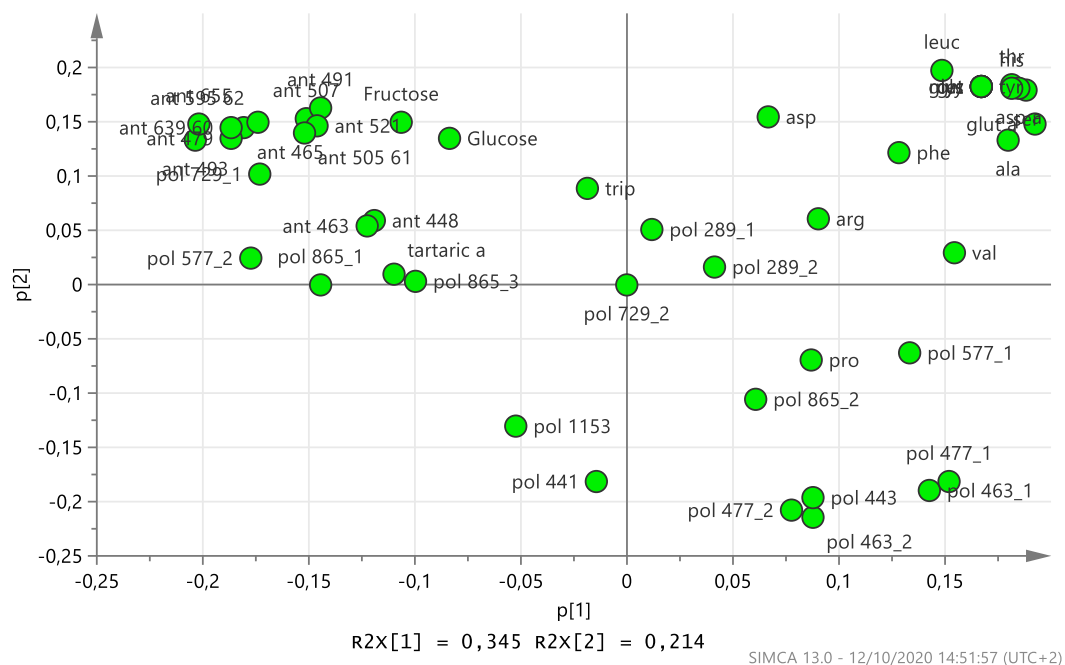

Figure S4. PCA score plot including all the samples of the four cultivars. Each dot represents a variable, namely one metabolite identified and quantified in berry, being a descriptor of the multivariate model.

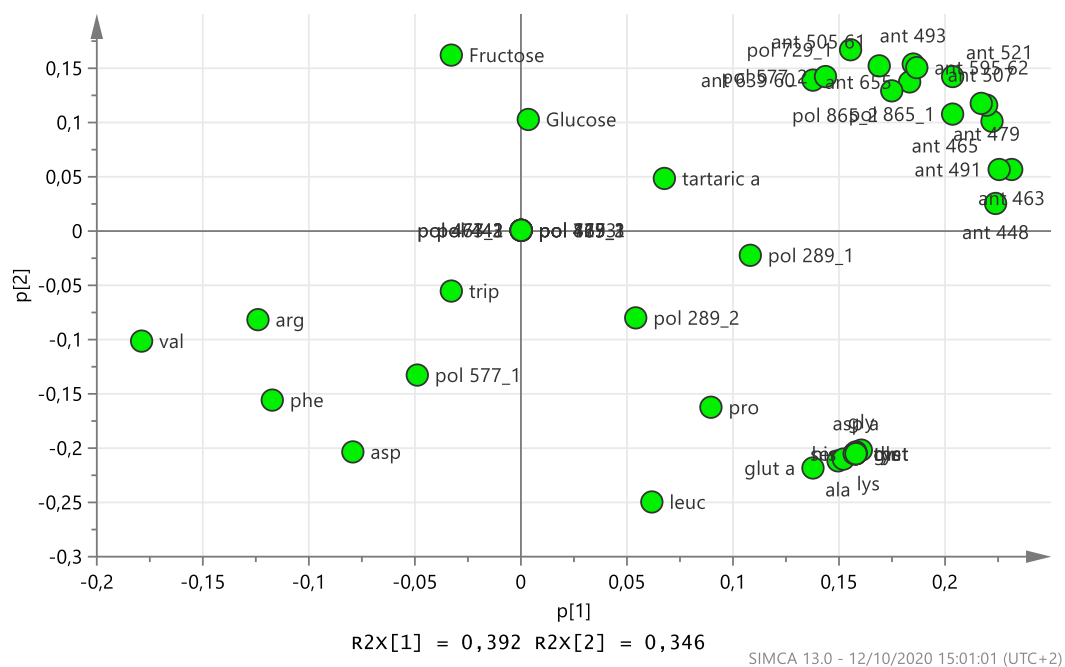

Figure S5. PCA score plot of the Oseletta berries. Each dot represents a variable, namely one metabolite identified and quantified in berry, being a descriptor of the multivariate model.



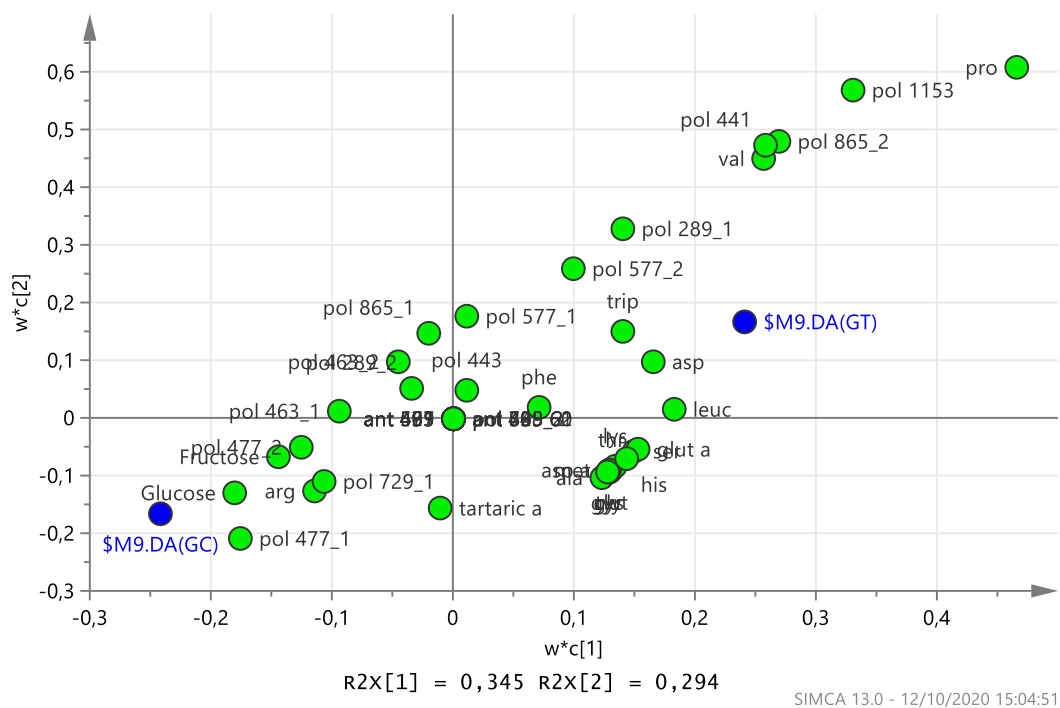

Figure S8. PLS-DA score plot of Garganega berries. Each dot represents a variable, namely one metabolite identified and quantified in berry, being a descriptor of the multivariate model.

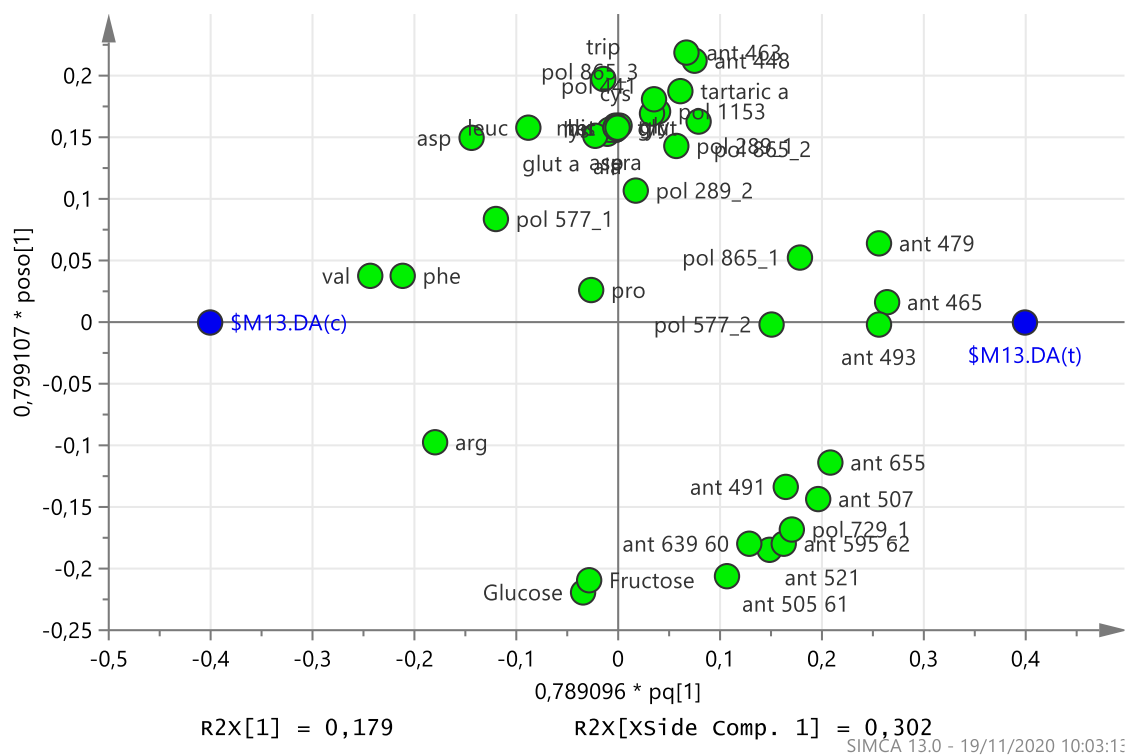

Figure S9. OPLS-DA Score plot of the red grape samples (Oseleta, Teroldego). Each dot represents a variable, namely one metabolite identified and quantified in berry, being a descriptor of the multivariate model

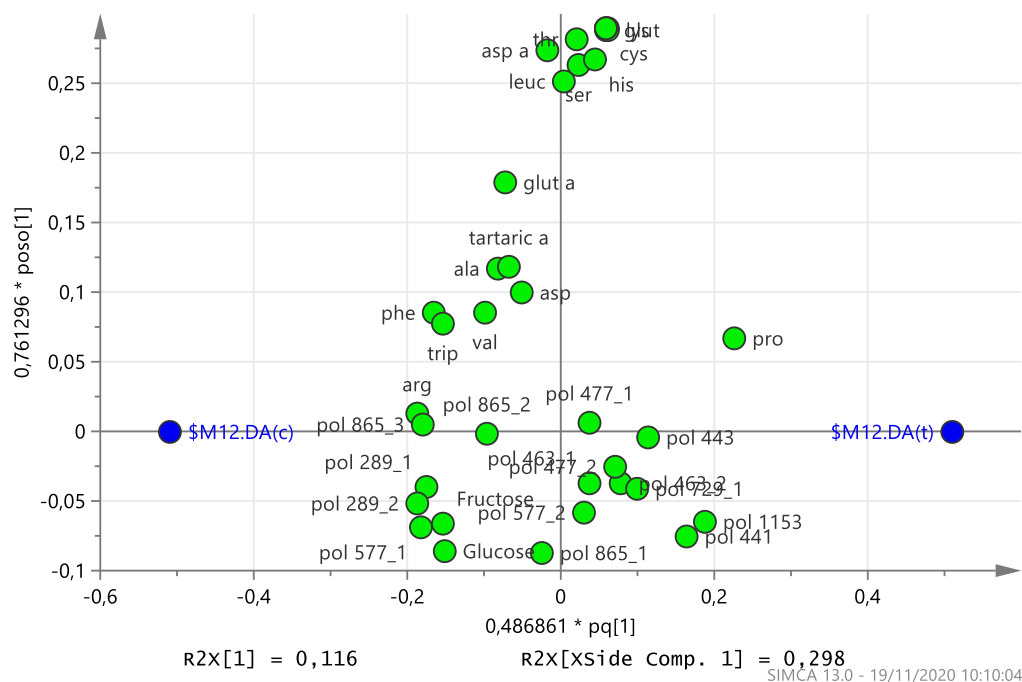

Figure S10. OPLS-DA Score plot of the white grape samples (Garganega, Chardonnay). Each dot represents a variable, namely one metabolite identified and quantified in berry, being a descriptor of the multivariate model.

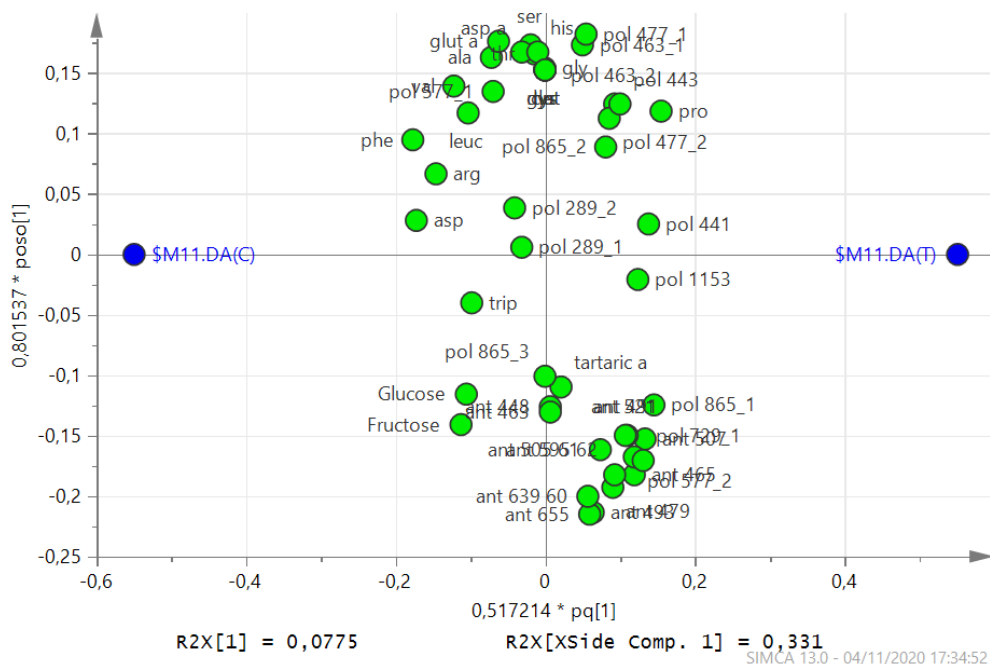

Figure S11. OPLS-DA Loading plot of all the samples (Garganega, Chardonnay, Teroldego, Oseletta). Each dot represents a variable, namely one metabolite identified and quantified in berry, being a descriptor of the multivariate model.

Table S2. abbreviation in multivariate elaboration

| compound | Abbreviation |
|----------|--------------|
| glycine  | gly          |

|                                                                                                                    |                 |
|--------------------------------------------------------------------------------------------------------------------|-----------------|
| alanine                                                                                                            | ala             |
| serine                                                                                                             | ser             |
| proline                                                                                                            | pro             |
| Valine                                                                                                             | val             |
| Threonine                                                                                                          | thr             |
| Cysteine                                                                                                           | cys             |
| Leucine                                                                                                            | leuc            |
| Asparagine                                                                                                         | asp             |
| Aspartic acid                                                                                                      | asp a           |
| Glutamine                                                                                                          | glut            |
| Lysine                                                                                                             | lys             |
| Glutamic acid                                                                                                      | glut a          |
| Methionine                                                                                                         | met             |
| Histidine                                                                                                          | his             |
| Phenylalanine                                                                                                      | phe             |
| Arginine                                                                                                           | arg             |
| Tyrosine                                                                                                           | tyr             |
| Tryptophan                                                                                                         | trip            |
| quercetin-7-O-glucoside                                                                                            | pol 463_1       |
| Quercetin-O-glucuronide                                                                                            | pol 477_1       |
| Quercetin-3-O-glucoside                                                                                            | pol 463_2       |
| Kaemferol-O-hexoside                                                                                               | pol 477_2       |
| pac dimer isomer 1                                                                                                 | pol 577_1       |
| Catechin                                                                                                           | pol 289_1       |
| pac trimer isomer 1                                                                                                | pol 865_1       |
| Unknown                                                                                                            | pol 443         |
| pac dimer isomer 2                                                                                                 | pol 577_2       |
| Epicatechin                                                                                                        | pol 289_2       |
| procyanidin dimer monogallate                                                                                      | pol 729_1       |
| pac trimer isomer 2                                                                                                | pol 865_2       |
| pac tetramer                                                                                                       | pol 1153        |
| procyanidin dimer monogallate                                                                                      | pol 729_2       |
| Catechin gallate                                                                                                   | pol 441         |
| pac trimer isomer 3                                                                                                | pol 865_3       |
| delphinidin-3-O-glucoside                                                                                          | ant 465         |
| cyanidin-3-O-glucoside                                                                                             | ant 448         |
| petunidin-3-O-glucoside                                                                                            | ant 479         |
| peonidin-3-O-glucoside                                                                                             | ant 463         |
| malvidin-3-O-glucoside                                                                                             | ant 493         |
| delphinidin-3-O-(6''-acetyl-glucoside)                                                                             | ant 507         |
| cyanidin-3-O-(6''-acetyl-glucoside)                                                                                | ant 491         |
| petunidin-3-O-(6''-acetyl-glucoside)                                                                               | ant 521         |
| peonidin-3-O-(6''-acetyl-glucoside) /delphinidin-3-O-(6-p-coumaroyl)glucoside/ malvidin-3-O-(6''-acetyl-glucoside) | ant 505 611 535 |
| malvidin-3-O-(6''-caffeoyl-glucoside)                                                                              | ant 655         |
| cyanidin-3-O-(6-p-coumaroyl)glucoside/ petunidin-3-O-(6-p-coumaroyl)glucoside                                      | ant 595 625     |
| malvidin-3-O-(6-p-coumaroyl)glucoside / peonidin-3-O-(6-p-coumaroyl)glucoside                                      | ant 639 609     |

Table S3. Triple quadrupole MS/MS parameters for the analysed amino-acids, polarity, Q1 and Q3 m/z as well as capillary, collision and dwell time are reported.



| Compound      | Polarity | Q1     | Q3     | Capillary | Collision | Dwell Time |
|---------------|----------|--------|--------|-----------|-----------|------------|
| Glycine       | Pos.     | 76.00  | 30.30  | 40.000    | 8.000     | 0.1        |
| Alanine       | Pos.     | 90.00  | 44.50  | 40.000    | 8.000     | 0.1        |
| Serine        | Pos.     | 106.00 | 60.40  | 30.000    | 8.500     | 0.1        |
| Proline       | Pos.     | 116.00 | 70.30  | 40.000    | 10.500    | 0.1        |
| Valine        | Pos.     | 118.00 | 72.40  | 30.000    | 8.500     | 0.1        |
| Threonine     | Pos.     | 120.00 | 74.40  | 30.000    | 8.000     | 0.1        |
| Cystine       | Pos.     | 122.00 | 75.70  | 30.000    | 11.500    | 0.1        |
| Isoleucine    | Pos.     | 132.00 | 86.50  | 40.000    | 7.000     | 0.1        |
| Leucine       | Pos.     | 132.00 | 86.50  | 40.000    | 7.500     | 0.1        |
| Asparagine    | Pos.     | 133.00 | 87.40  | 40.000    | 6.500     | 0.1        |
| Aspartic Acid | Pos.     | 134.00 | 74.30  | 33.876    | 12.000    | 0.1        |
| Glutamine     | Pos.     | 147.00 | 84.40  | 30.000    | 14.000    | 0.1        |
| Lysine        | Pos.     | 147.10 | 84.40  | 30.000    | 13.500    | 0.1        |
| Glutamic Acid | Pos.     | 148.00 | 83.70  | 30.000    | 13.000    | 0.1        |
| Methionine    | Pos.     | 150.00 | 133.40 | 38.318    | 6.000     | 0.1        |
| Histidine     | Pos.     | 156.10 | 110.00 | 40.000    | 9.500     | 0.1        |
| Phenylalanine | Pos.     | 166.10 | 119.60 | 40.000    | 9.500     | 0.1        |
| Arginine      | Pos.     | 175.10 | 70.40  | 40.000    | 18.000    | 0.1        |
| Tyrosine      | Pos.     | 182.10 | 135.60 | 40.000    | 10.000    | 0.1        |
| Tryptophan    | Pos.     | 205.10 | 187.60 | 40.000    | 7.000     | 0.1        |
